# Supplementary material
Source: Springer Nature journal article supplement (https://www.springermedizin.de/resource/supplementary/12245_2011_111_MOESM1_ESM.pdf/9672796)
Supplement: MOESM1 [file 9672796]

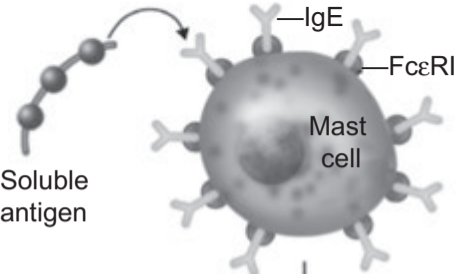

Soluble antigen

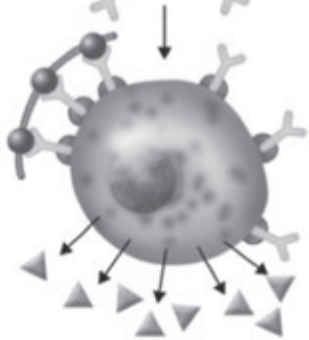

- Histamine
- Proteolytic enzymes
- Cytokines (IL-4, IL-5, TNF- $\alpha$ )
- Leukotrienes
- Chemokines

Tissue damage
